# Supplementary material for: Adsorptive removal of tetracycline and ciprofloxacin drugs from water by using a magnetic rod-like hydroxyapatite and MIL-101(Fe) metal–organic framework nanocomposite
Source: Royal Society of Chemistry journal article supplement (doi:10.1039/d2ra06213e), 2022-01-01
Supplement: d2ra06213e1.pdf [file d2ra06213e1.pdf]

## Supplementary Information

### Adsorptive removal of tetracycline and ciprofloxacin drugs from water by using magnetic rod-like hydroxyapatite and MIL-101(Fe) metal-organic framework nanocomposite

Maryam Beiranvand <sup>a</sup>, Saeed Farhadi<sup>a,\*</sup>, Abdolnasar Mohammadi-Gholami<sup>b</sup>

<sup>a</sup> Department of Chemistry, Lorestan University, Khorramabad, 68151-44316, Iran.

<sup>b</sup> Department of Biology, Lorestan University, Khorramabad, 68151-44316, Iran

Email address: [farhadi.s@lu.ac.ir](mailto:farhadi.s@lu.ac.ir) (S. Farhadi)

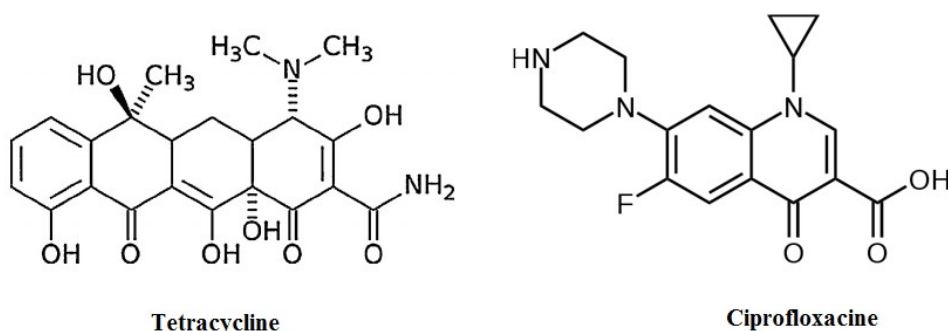

**Fig. S1.** Structure of TC and CIP antibiotics.

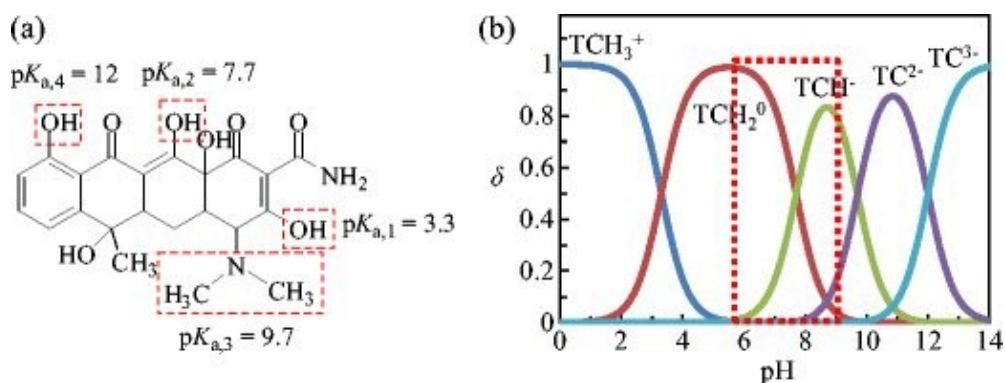

**Fig. S2.** Speciation of TC at different pHs

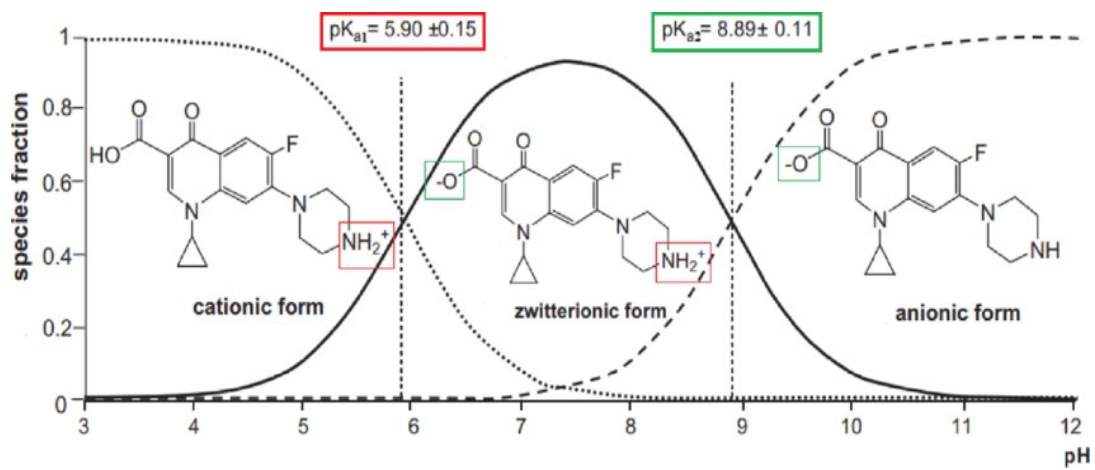

**Fig. S3.** Speciation of CIP at different pHs
